# Supplementary material for: Multicolour barcoding in one MOF crystal through rational postsynthetic transmetalation
Source: Royal Society of Chemistry journal article supplement (doi:10.1039/c9tc05678e), 2020-01-01
Supplement: c9tc05678e1.pdf [file c9tc05678e1.pdf]

# Supplementary Information

## Multicolour Barcoding in One MOF Crystal Through Rationally Postsynthetic Transmetalation

Weilinsen Ding, Lina Zhao, Xiaoyun Yuan, Lantian Zhang, Baojun Chen, Qiang Ju\*  
and Zhenlan Fang\*

### Table of Contents

#### 1. Tables

1.1 Table S1 (Crystal Data and Structure Refinement Results for *IAM19-1*)

1.2 Table S2 (Selected Bond Lengths (Å) and Angles (°) for *IAM19-1*)

#### 2. Figures

1) Nitrogen Adsorption and Desorption Isotherms (Figure S1)

2) PXRD Patterns and Crystallographic Data (Figure S2-S5, Figure S16)

2.1 PXRD patterns of *IAM19-1* (Ce<sup>3+</sup>-MOF).

2.2 PXRD patterns of *IAM19-1a* (Tb<sup>3+</sup>, Ce<sup>3+</sup>-MOF).

2.3 PXRD patterns of *IAM19-1b* (Eu<sup>3+</sup>, Ce<sup>3+</sup>-MOF).

2.4 PXRD patterns of *IAM19-1c* (Eu<sup>3+</sup>, Ce<sup>3+</sup>@Tb<sup>3+</sup>, Ce<sup>3+</sup>-MOF).

2.5 PXRD patterns of activated *IAM19-1* (Ce<sup>3+</sup>-MOF)

3) IR-Spectroscopy (Figure S6)

4) Optical Properties (Figure S7-S15, S17-S21)

4.1 Decay curves of *IAM19-1a* (Tb<sup>3+</sup>, Ce<sup>3+</sup>-MOF), and *IAM19-1b* (Eu<sup>3+</sup>, Ce<sup>3+</sup>-MOF).

4.2 The emission spectra of *IAM19-1* (Ce<sup>3+</sup>-MOF).

4.3 Emission spectra of *IAM19-1a* when *IAM19-1* was immersed in Eu<sup>3+</sup> solution at different temperature, different time, different concentration, and different solvent.

4.4 Excitation and emission spectra of *IAM19-1a* (Tb<sup>3+</sup>, Ce<sup>3+</sup>-MOF), *IAM19-1b* (Eu<sup>3+</sup>, Ce<sup>3+</sup>-MOF), and *IAM19-1c* (Eu<sup>3+</sup>, Ce<sup>3+</sup>@Tb<sup>3+</sup>, Ce<sup>3+</sup>-MOF).

4.5 The emission photography of *IAM19-1a*, *IAM19-1b*, *IAM19-1c* and *IAM19-1c'*.

4.6 The fabrication procedure for *IAM19-1c* and *IAM19-1c'*.

## 5) Thermogravimetric Analysis (Figure S22-S24)

- 5.1 Thermogravimetric analysis of *IAM19-1* ( $\text{Ce}^{3+}$ -MOF) and *IAM19-1a* ( $\text{Tb}^{3+}$ ,  $\text{Ce}^{3+}$ -MOF).
- 5.2 Thermogravimetric analysis of *IAM19-1* ( $\text{Ce}^{3+}$ -MOF) and *IAM19-1b* ( $\text{Eu}^{3+}$ ,  $\text{Ce}^{3+}$ -MOF).
- 5.3 Thermogravimetric analysis of *IAM19-1* ( $\text{Ce}^{3+}$ -MOF) and *IAM19-1c* ( $\text{Eu}^{3+}$ ,  $\text{Ce}^{3+}@\text{Tb}^{3+}$ ,  $\text{Ce}^{3+}$ -MOF).

**Table S1.** Crystal Data and Structure Refinement Results for *IAM19-1*

| MOF                                        | <i>IAM19-1</i>                                                  |
|--------------------------------------------|-----------------------------------------------------------------|
| empirical formula                          | Ce <sub>4</sub> C <sub>84</sub> H <sub>64</sub> O <sub>37</sub> |
| formula weight                             | 2225.80                                                         |
| crystal system                             | Monoclinic                                                      |
| space group                                | <i>P</i> 21/ <i>c</i>                                           |
| <i>Z</i>                                   | 2                                                               |
| <i>a</i> (Å)                               | 13.576(2)                                                       |
| <i>b</i> (Å)                               | 29.448(3)                                                       |
| <i>c</i> (Å)                               | 9.523(1)                                                        |
| $\alpha$ (deg)                             | 90                                                              |
| $\beta$ (deg)                              | 93.152(3)                                                       |
| $\gamma$ (deg)                             | 90                                                              |
| <i>V</i> (Å <sup>3</sup> )                 | 3801.3(7)                                                       |
| $\rho_{\text{calcd}}$ (g/cm <sup>3</sup> ) | 1.941                                                           |
| $\mu$ (mm <sup>-1</sup> )                  | 2.452                                                           |
| temp (K)                                   | 295                                                             |
| GOF                                        | 1.043                                                           |
| $R_1$ ( $I > 2\sigma(I)$ ) <sup>a</sup>    | 0.046                                                           |
| $wR_2$ ( $I > 2\sigma(I)$ ) <sup>a</sup>   | 0.186                                                           |
| $R_1$ (all data) <sup>b</sup>              | 0.062                                                           |
| $wR_2$ (all data) <sup>b</sup>             | 0.202                                                           |

$$^a R_1 = \sum ||F_o| - |F_c|| / \sum |F_o|; \quad ^b wR_2 = \{ \sum [w(F_o^2 - F_c^2)^2] / \sum [w(F_o^2)^2] \}^{1/2}$$

**Table S2.** Selected Bond Lengths (Å) and Angles (°) for **IAM19-1**

|                      |            |                       |            |
|----------------------|------------|-----------------------|------------|
| Ce(1)-O(1)           | 2.436(3)   | Ce(1)-O(16)           | 2.518(4)   |
| Ce(1)-O(4)#1         | 2.457(3)   | Ce(1)-O(14)#4         | 2.560(4)   |
| Ce(1)-O(15)#2        | 2.460(4)   | Ce(1)-O(17)           | 2.723(4)   |
| Ce(1)-O(5)#3         | 2.465(4)   | Ce(1)-O(4)#3          | 2.743(3)   |
| Ce(1)-O(11)          | 2.475(4)   | Ce(1)-Ce(1)#5         | 4.0599(7)  |
| Ce(2)-O(12)          | 2.424(3)   | Ce(2)-O(10)#7         | 2.519(4)   |
| Ce(2)-O(6)           | 2.436(4)   | Ce(2)-O(18)           | 2.610(6)   |
| Ce(2)-O(2)           | 2.453(4)   | Ce(2)-O(17)           | 2.755(4)   |
| Ce(2)-O(9)#3         | 2.476(4)   | Ce(2)-O(6)#6          | 2.891(4)   |
| Ce(2)-O(7)#6         | 2.484(4)   | Ce(2)-Ce(2)#6         | 4.0716(8)  |
| O(1)-Ce(1)-O(4)#1    | 145.33(12) | O(15)#2-Ce(1)-O(5)#3  | 80.77(13)  |
| O(1)-Ce(1)-O(15)#2   | 137.38(12) | O(1)-Ce(1)-O(11)      | 91.39(12)  |
| O(4)#1-Ce(1)-O(15)#2 | 76.17(12)  | O(4)#1-Ce(1)-O(11)    | 86.86(12)  |
| O(1)-Ce(1)-O(5)#3    | 76.69(12)  | O(15)#2-Ce(1)-O(11)   | 79.14(14)  |
| O(4)#1-Ce(1)-O(5)#3  | 126.99(11) | O(5)#3-Ce(1)-O(11)    | 134.26(12) |
| O(1)-Ce(1)-O(16)     | 72.12(13)  | O(1)-Ce(1)-O(14)#4    | 79.91(12)  |
| O(4)#1-Ce(1)-O(16)   | 74.17(12)  | O(4)#1-Ce(1)-O(14)#4  | 81.14(12)  |
| O(15)#2-Ce(1)-O(16)  | 140.51(13) | O(15)#2-Ce(1)-O(14)#4 | 129.93(12) |
| O(5)#3-Ce(1)-O(16)   | 138.44(13) | O(5)#3-Ce(1)-O(14)#4  | 78.38(12)  |
| O(11)-Ce(1)-O(16)    | 73.79(13)  | O(11)-Ce(1)-O(14)#4   | 143.48(13) |
| O(16)-Ce(1)-O(14)#4  | 69.77(13)  | O(11)-Ce(1)-O(17)     | 69.20(12)  |
| O(1)-Ce(1)-O(17)     | 71.08(12)  | O(16)-Ce(1)-O(17)     | 126.09(14) |
| O(4)#1-Ce(1)-O(17)   | 138.59(11) | O(14)#4-Ce(1)-O(17)   | 137.32(11) |
| O(15)#2-Ce(1)-O(17)  | 66.69(13)  | O(1)-Ce(1)-O(4)#3     | 118.34(11) |
| O(5)#3-Ce(1)-O(17)   | 65.13(11)  | O(4)#1-Ce(1)-O(4)#3   | 77.50(12)  |
| O(15)#2-Ce(1)-O(4)#3 | 68.14(12)  | O(17)-Ce(1)-O(4)#3    | 103.73(12) |
| O(5)#3-Ce(1)-O(4)#3  | 49.58(11)  | O(12)-Ce(2)-O(6)      | 147.21(13) |
| O(11)-Ce(1)-O(4)#3   | 146.18(12) | O(12)-Ce(2)-O(2)      | 90.51(12)  |
| O(16)-Ce(1)-O(4)#3   | 128.20(12) | O(6)-Ce(2)-O(2)       | 85.23(13)  |
| O(14)#4-Ce(1)-O(4)#3 | 63.62(11)  | O(12)-Ce(2)-O(9)#3    | 135.12(13) |
| O(6)-Ce(2)-O(9)#3    | 75.54(14)  | O(9)#3-Ce(2)-O(7)#6   | 81.14(14)  |
| O(2)-Ce(2)-O(9)#3    | 77.67(15)  | O(12)-Ce(2)-O(10)#7   | 81.57(12)  |
| O(12)-Ce(2)-O(7)#6   | 76.50(12)  | O(6)-Ce(2)-O(10)#7    | 83.89(13)  |
| O(6)-Ce(2)-O(7)#6    | 128.03(13) | O(2)-Ce(2)-O(10)#7    | 145.77(15) |
| O(2)-Ce(2)-O(7)#6    | 133.76(14) | O(9)#3-Ce(2)-O(10)#7  | 129.99(14) |
| O(7)#6-Ce(2)-O(10)#7 | 76.71(14)  | O(7)#6-Ce(2)-O(18)    | 140.00(17) |
| O(12)-Ce(2)-O(18)    | 74.14(15)  | O(10)#7-Ce(2)-O(18)   | 72.65(17)  |
| O(6)-Ce(2)-O(18)     | 73.52(16)  | O(12)-Ce(2)-O(17)     | 70.02(12)  |
| O(2)-Ce(2)-O(18)     | 73.15(17)  | O(6)-Ce(2)-O(17)      | 136.66(12) |
| O(9)#3-Ce(2)-O(18)   | 138.70(17) | O(2)-Ce(2)-O(17)      | 69.47(12)  |
| O(9)#3-Ce(2)-O(17)   | 65.26(13)  | O(6)-Ce(2)-O(6)#6     | 80.66(13)  |
| O(7)#6-Ce(2)-O(17)   | 64.35(12)  | O(2)-Ce(2)-O(6)#6     | 145.59(13) |
| O(10)#7-Ce(2)-O(17)  | 135.76(12) | O(9)#3-Ce(2)-O(6)#6   | 68.48(13)  |
| O(18)-Ce(2)-O(17)    | 126.96(14) | O(7)#6-Ce(2)-O(6)#6   | 47.51(11)  |
| O(12)-Ce(2)-O(6)#6   | 117.73(11) | O(10)#7-Ce(2)-O(6)#6  | 63.42(13)  |
| O(18)-Ce(2)-O(6)#6   | 130.80(14) | O(17)-Ce(2)-O(6)#6    | 100.52(12) |

Symmetry transformations used to generate equivalent atoms:

**IAM19-1**, (#1) -x, y-1/2, -z+3/2; (#2) x, -y-1/2, z+1/2; (#3) x, -y+1/2, z+1/2; (#4) -x, y+1/2, -z+3/2; (#5) -x, -y, -z+2; (#6) -x+1, -y, -z+1; (#7) -x+1, y-1/2, -z+1/2; (#8) x, -y+1/2, z-1/2; (#9) -x+1, y+1/2, -z+1/2; (#10) x, -y-1/2, z-1/2.

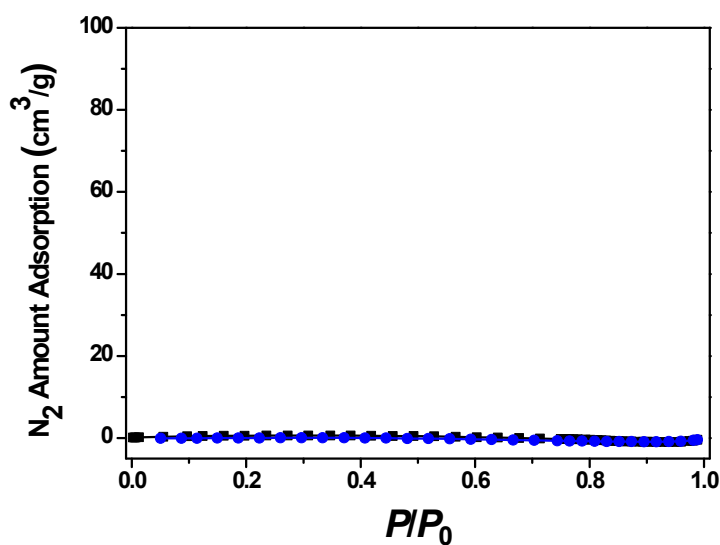

**Figure S1.** Nitrogen adsorption (blue line) and desorption (black line) isotherms for *IAM19-1* after thermal activation at 280 °C for 12 hours.

It indicates that no available idle space is presented in the activated *IAM19-1* after removing the free and coordinated water molecules.

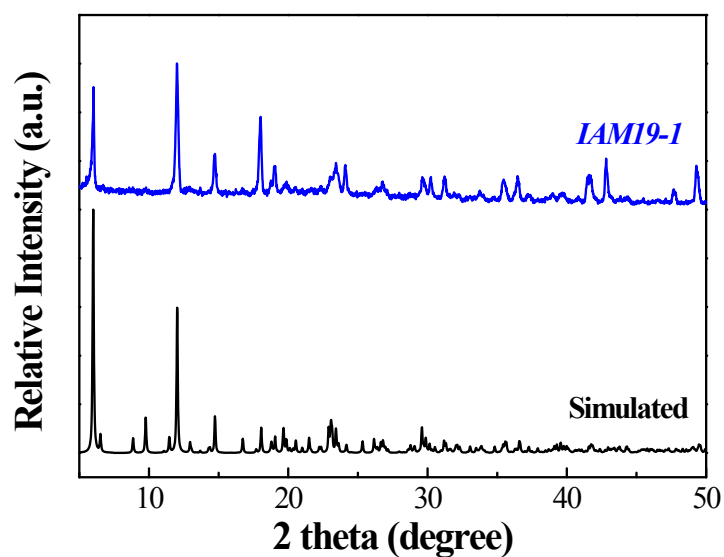

**Figure S2.** The powder X-ray diffraction pattern of *IAM19-1* and simulated pattern from a single crystal of *IAM19-1*.

The powder X-ray diffraction pattern of as-synthesized *IAM19-1* matches well with that of simulated from the CIF file of an *IAM19-1* single crystal, demonstrating that the as-synthesized *IAM19-1* sample is pure.

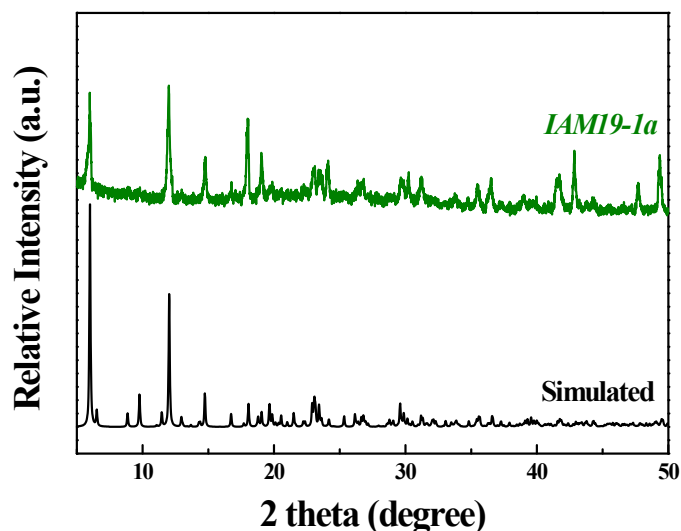

**Figure S3.** The powder X-ray diffraction pattern of *IAM19-1a* and the simulated X-ray diffraction pattern from a single crystal of *IAM19-1*.

The powder X-ray diffraction pattern of as-synthesized *IAM19-1a* matches well with that of simulated from the CIF file of an *IAM19-1* single crystal, demonstrating that the as-synthesized *IAM19-1a* sample is pure, and maintains the framework of parent *IAM19-1*.

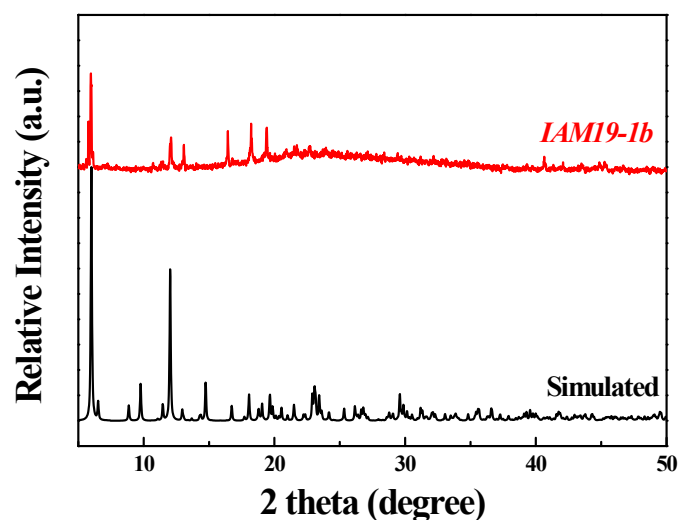

**Figure S4.** The powder X-ray diffraction pattern of *IAM19-1b* and the simulated powder X-ray diffraction pattern from a single crystal of *IAM19-1*.

The powder X-ray diffraction pattern of as-synthesized *IAM19-1b* matches well with that of simulated from the CIF file of an *IAM19-1* single crystal, demonstrating that the as-synthesized *IAM19-1b* sample is pure, and maintains the framework of parent *IAM19-1*.

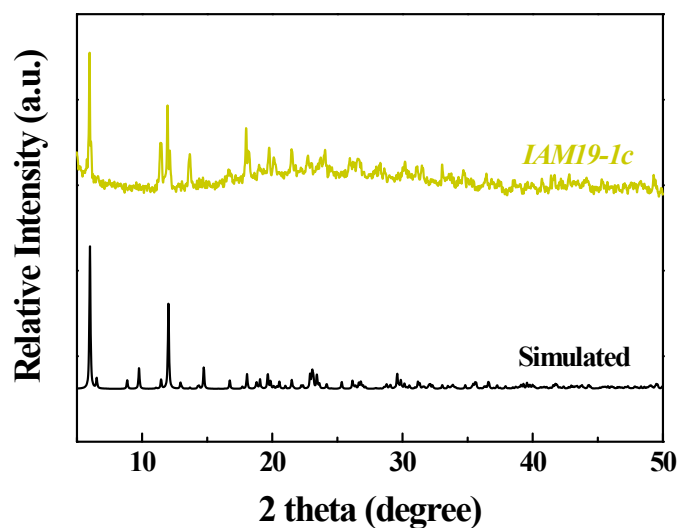

**Figure S5.** The powder X-ray diffraction pattern of *IAM19-1c* and the simulated powder X-ray diffraction pattern from a single crystal of *IAM19-1*.

The powder X-ray diffraction pattern of as-synthesized *IAM19-1c* matches well with that of simulated from the CIF file of an *IAM19-1* single crystal, demonstrating that the as-synthesized *IAM19-1c* sample is pure, and maintains the framework of parent *IAM19-1*.

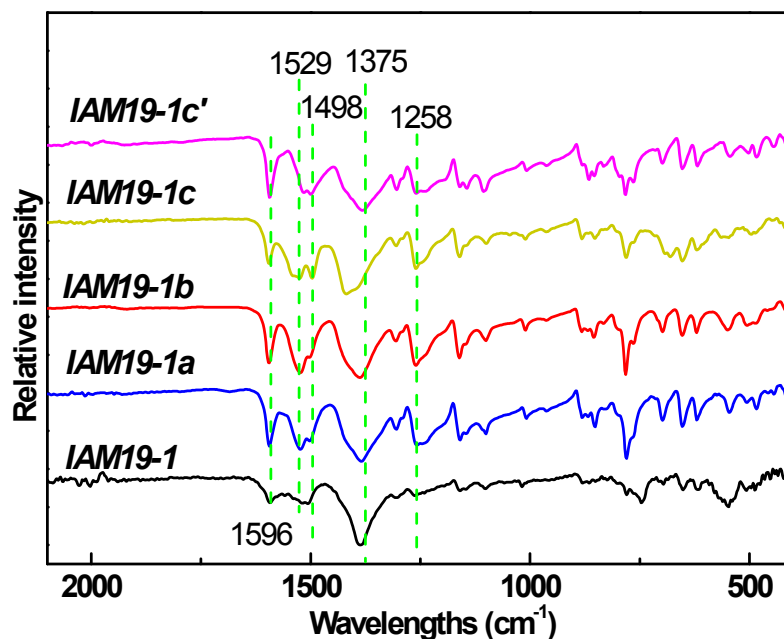

**Figure S6.** FT-IR spectra of *IAM19-1* (black), *IAM19-1a* (blue), *IAM19-1b* (red), *IAM19-1c* (yellow), and *IAM19-1c'* (pink).

The band centered at  $\sim 1596$ ,  $\sim 1529$ – $1498$ ,  $\sim 1375$  and  $\sim 1258$   $\text{cm}^{-1}$  can be attributed to the asymmetrical C=O stretching mode of carboxylate group, C=C stretching mode of benzene ring, symmetrical C=O stretching mode of carboxylate group, and C-O stretching of aromatic ether, respectively. The high similarity of the parent Ce-MOF *IAM19-1* and all the other derived luminescent MOFs further demonstrates the postsynthetic MOFs maintain the framework of parent Ce-MOF. Compared with *IAM19-1*, the band shifts and changes of relative intensity in the FT-IR spectra of *IAM19-1a*, *IAM19-1b*, *IAM19-1c*, *IAM19-1c'* primarily result from the incorporation of  $\text{Eu}^{3+}$ ,  $\text{Tb}^{3+}$  or both.



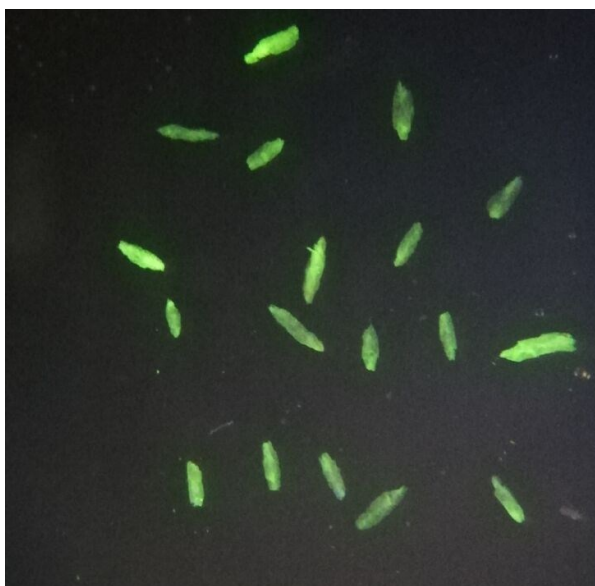

**Figure S7.** Photography of green luminescent *IAM19-1a* (Tb<sup>3+</sup>, Ce<sup>3+</sup>-MOF) obtained from single crystal after PSTM under irradiation at 254 nm with a 4 W hand-held UV lamp.

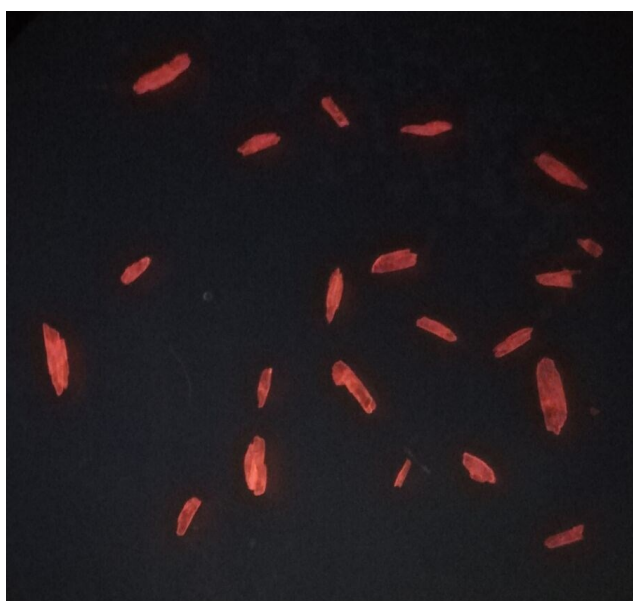

**Figure S8.** Photography of red luminescent *IAM19-1b* (Eu<sup>3+</sup>, Ce<sup>3+</sup>-MOF) obtained from single crystal after PSTM under irradiation at 254 nm with a 4 W hand-held UV lamp.

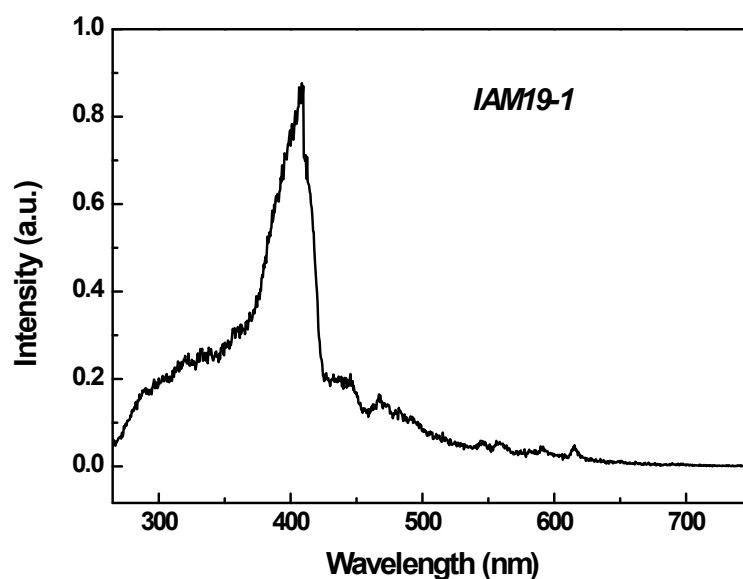

**Figure S9.** Emission spectra of *IAM19-1* under the excitation of 254 nm.

The intensity of *IAM19-1* is only one percentage of that of *IAM19-1a* and *IAM19-1b* under the same condition. Therefore, the emission of  $\text{Ce}^{3+}$  is difficult to be detected out in the *IAM19-1a*, *IAM19-1b*, *IAM19-1c*, *IAM19-1c'*.

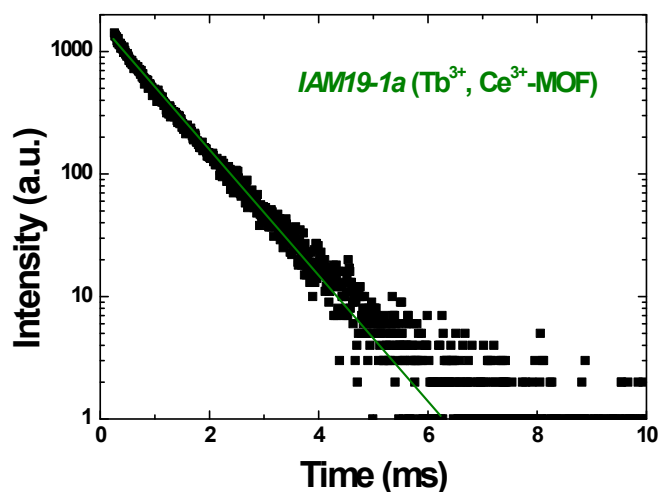

**Figure S10.** Photoluminescent decay from  $^5\text{D}_4$  of  $\text{Tb}^{3+}$  in *IAM19-1a* under excitation at 254 nm.

The green line represents the profile fitted by single-exponential function, which shows a lifetime to be 0.74 ms.

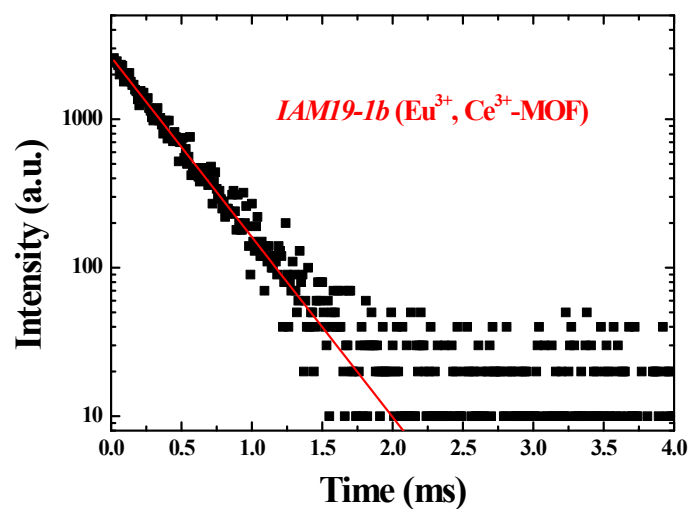

**Figure S11.** Photoluminescent decay from  $^5D_0$  of Eu<sup>3+</sup> in *IAM19-1b* under excitation at 254 nm.

The red line represents the profile fitted by single-exponential function, which shows a lifetime to be 0.35 ms.

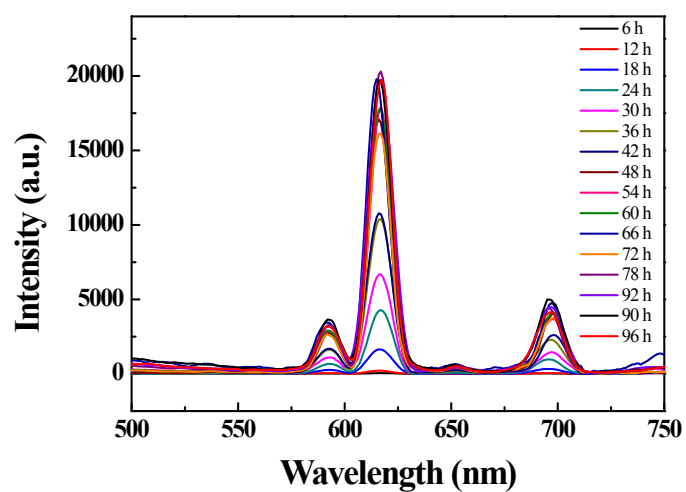

**Figure S12.** Emission spectra of *IAM19-1b* when *IAM19-1* was immersed in Eu<sup>3+</sup> aqueous solution (0.2 M) at 80 °C for different time under excitation at 254 nm.

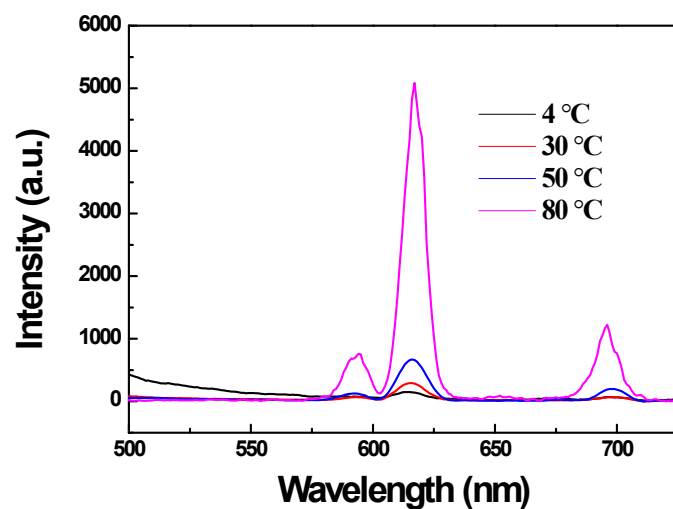

**Figure S13.** Emission spectra of *IAM19-1a* when *IAM19-1* was immersed in Eu<sup>3+</sup> aqueous solution (0.2 M) for 20 hours at different temperature under excitation at 254 nm.

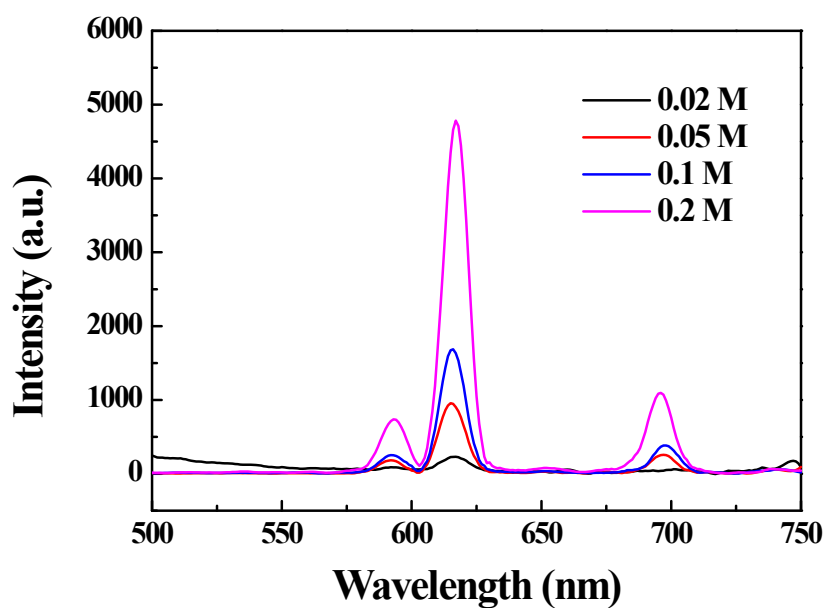

**Figure S14.** Emission spectra of *IAM19-1b* when *IAM19-1* was immersed in Eu<sup>3+</sup> aqueous solution for 24 hours at 80 °C at different concentrations under excitation at 254 nm.

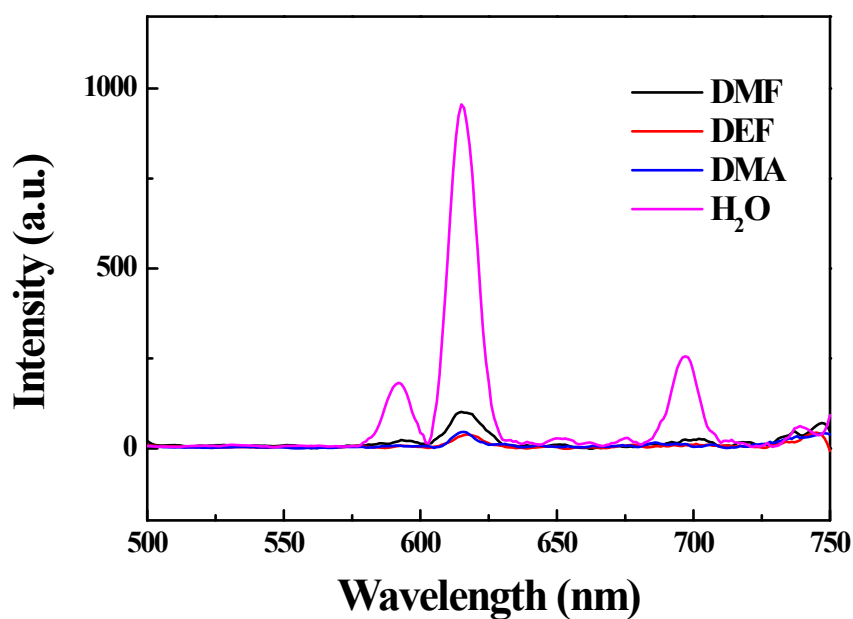

**Figure S15.** Emission spectra of *IAM19-1b* when *IAM19-1* was immersed in  $\text{Eu}^{3+}$  solution (0.05 M) for 24 hours at 80 °C in different solvents under excitation at 254 nm.

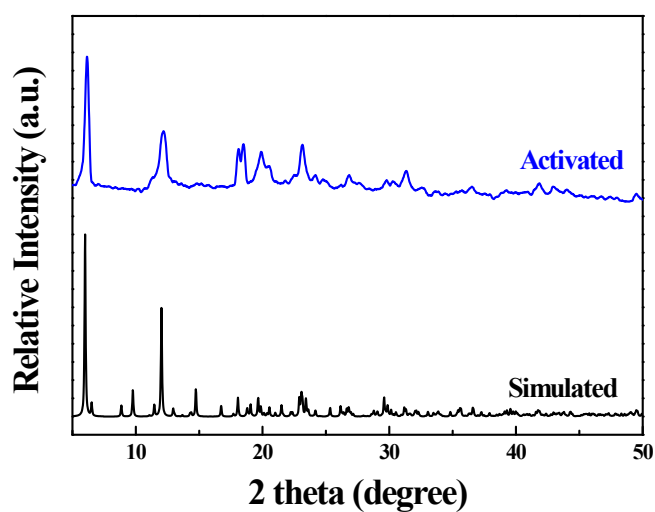

**Figure S16.** The comparison of the measured powder X-ray diffraction pattern of *IAM19-1* after activation 280 °C for 12 hours with the simulated powder X-ray diffraction pattern obtained from a single crystal of *IAM19-1*.

The result demonstrates that the activated sample is pure and it maintains the framework of *IAM19-1* after activation.

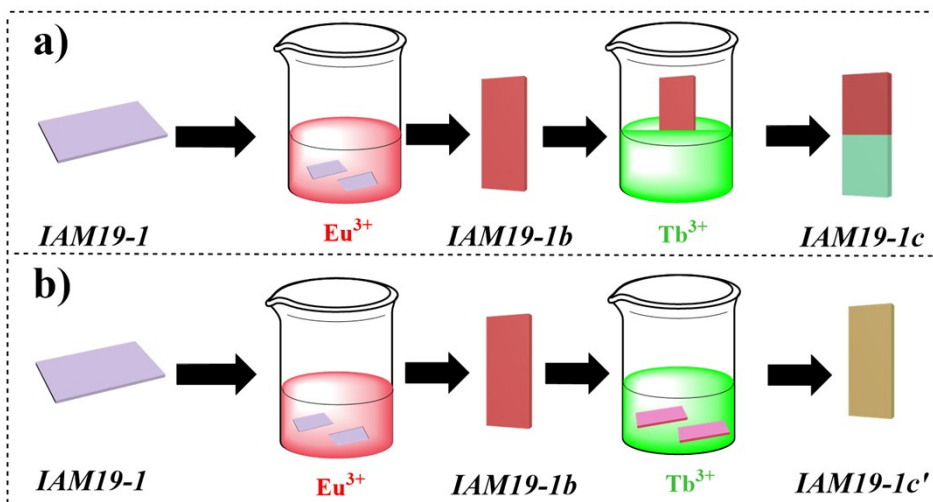

**Figure S17.** Schematic diagram illustrating the PSTM procedure for producing a) dual-emissive *IAM19-1c* and b) homogeneous *IAM19-1c'*.

When one end of *IAM19-1b* was dipped into  $\text{Tb}^{3+}$  solution, the dual-emissive one-crystal *IAM19-1c* was formed, while when *IAM19-1b* was completely immersed in  $\text{Tb}^{3+}$  solution, the homogeneous yellow luminescent *IAM19-1c'* can be obtained.

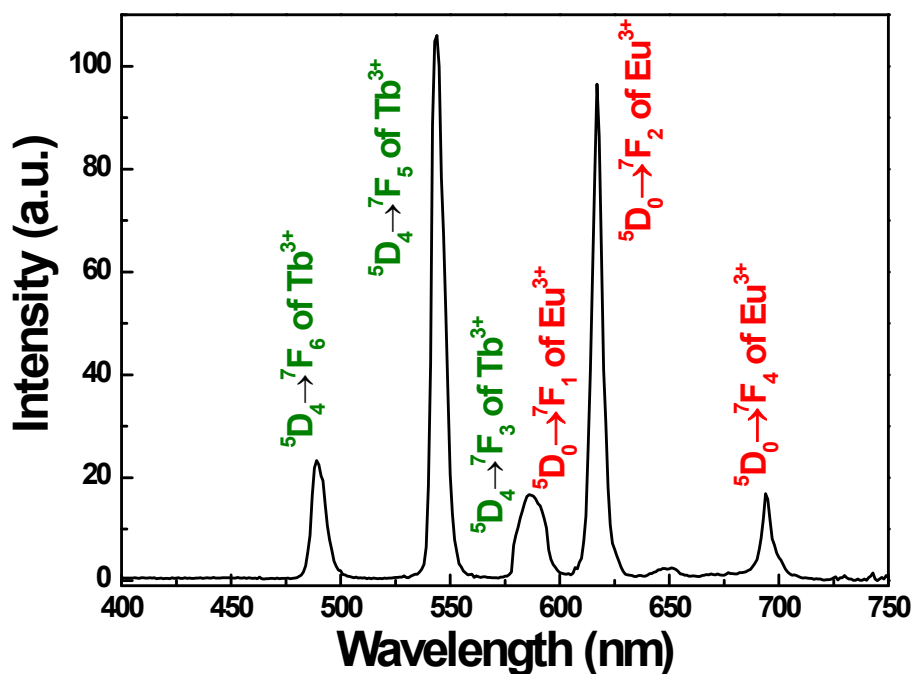

**Figure S18.** Emission spectra of *IAM19-1c* under the excitation of 254 nm.

It unambiguously proves the presence of both  $\text{Tb}^{3+}$  and  $\text{Eu}^{3+}$  in *IAM19-1c* MOFs.

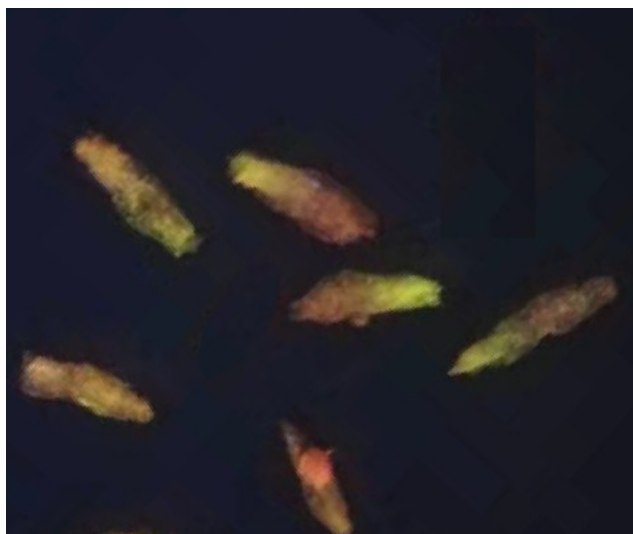

**Figure S19.** Photography of dual-emissive (red@green) *IAM19-1c* ( $\text{Eu}^{3+}$ ,  $\text{Ce}^{3+}@\text{Tb}^{3+}$ ,  $\text{Ce}^{3+}$ -MOF) taken by ordinary microscope under the excitation of 254 nm.

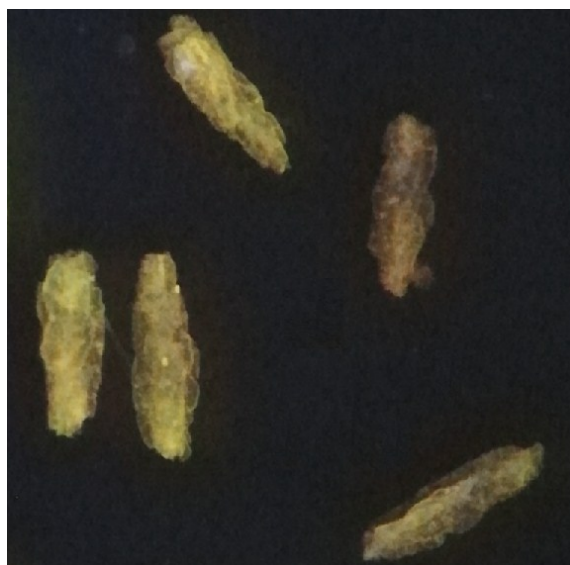

**Figure S20.** Photography of homogeneous yellow luminescent *IAM19-1c'* ( $\text{Eu}^{3+}$ ,  $\text{Tb}^{3+}$ ,  $\text{Ce}^{3+}$ -MOF) taken by ordinary microscope under the excitation of 254 nm.

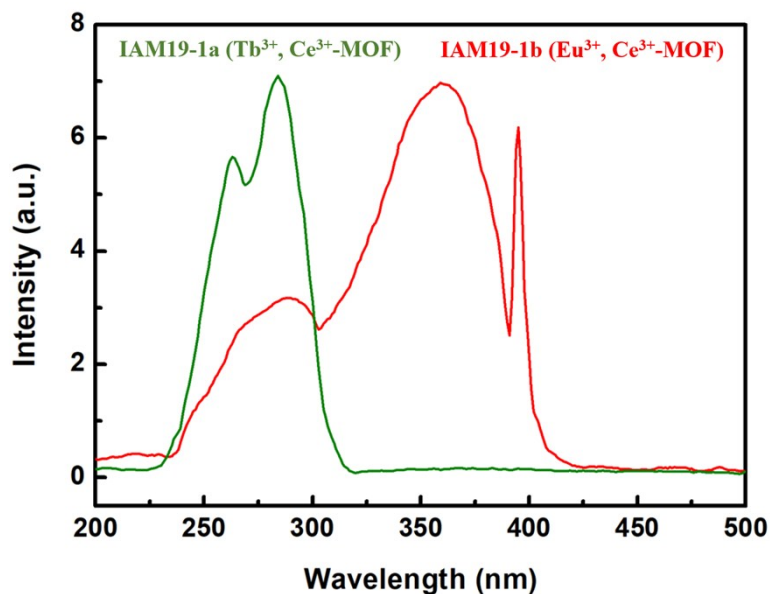

**Figure S21.** Excitation spectra of *IAM19-1a* (green,  $\lambda_{em}=543$ ) and *IAM19-1b* (red,  $\lambda_{em}=617$ ).

The spectra demonstrate that the energy transfer from  $Ce^{3+}$  to  $Tb^{3+}$  is more sensitive while the intrinsic excitation of  $Eu^{3+}$  (396 nm,  $^7F_0 \rightarrow ^5L_6$  transition of  $Eu^{3+}$ , represented by the red line) is stronger than that of  $Tb^{3+}$  (represented by the green line).

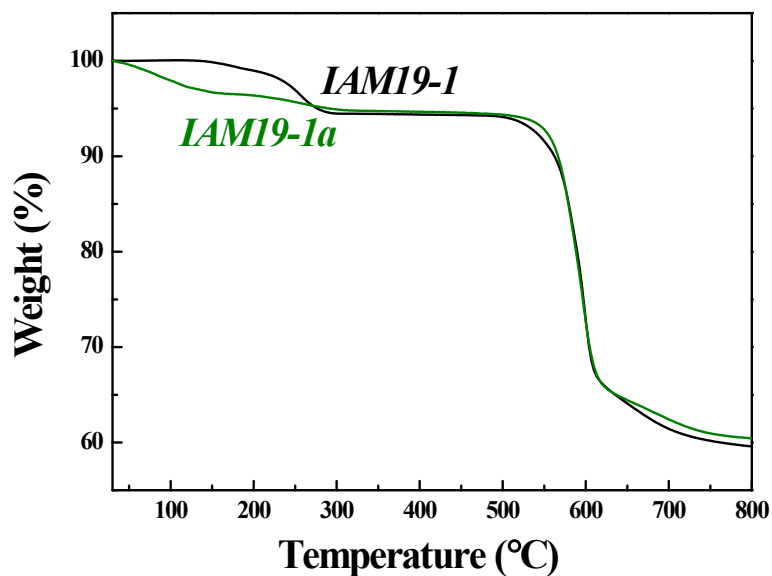

**Figure S22.** The TGA curves of *IAM19-1a* (green) and *IAM19-1* (black).



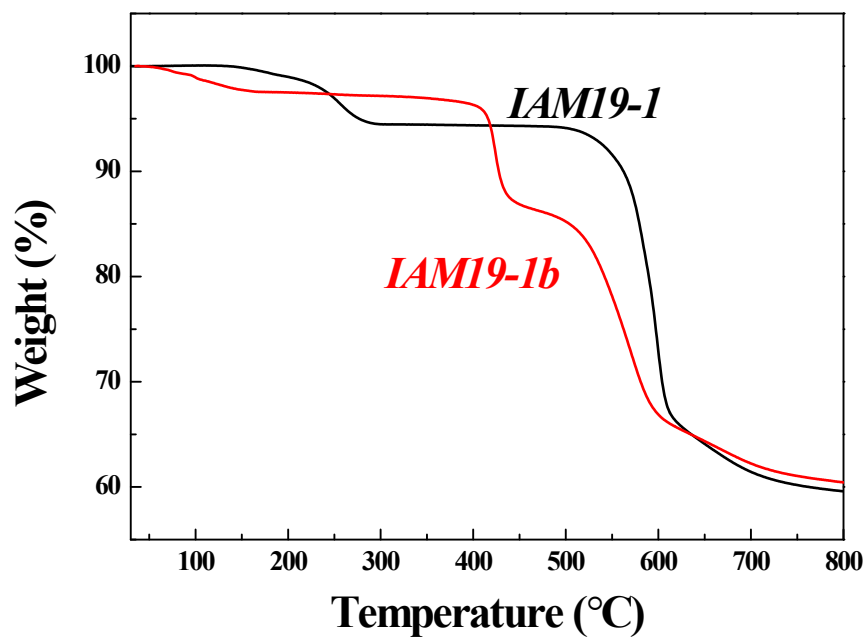

Figure S23. The TGA curves of *IAM19-1b* (red) and *IAM19-1* (black).

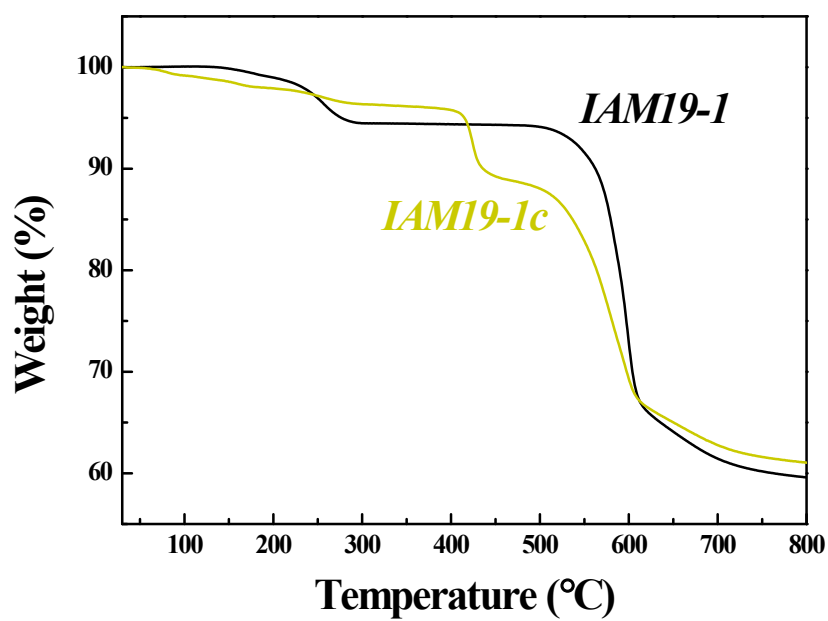

Figure S24. The TGA curves of *IAM19-1c* (yellow) and *IAM19-1* (black).
